# Supplementary material for: Blood genome expression profiles in infants with congenital cytomegalovirus infection
Source: PubMed Central journal article supplement (PMC7363904; doi:10.1038/s41467-020-17178-5), 2020-07-15
Supplement: 41467_2020_17178_MOESM1_ESM.pdf [file 41467_2020_17178_MOESM1_ESM.pdf]

**Supplemental Tables and Figures**

**Blood Genome Expression Profiles in Infants with Congenital Cytomegalovirus Infection**

Ouellette et al.

Supplementary Table 1: Demographic characteristics of healthy controls included and excluded from downstream analyses.

|                         | HC included<br>(n=10) | HC excluded<br>(n=11) | p-value |
|-------------------------|-----------------------|-----------------------|---------|
| Age (days)              | 11 (7-33)             | 21 (1-50)             | > 0.99  |
| Gestational age (weeks) | 38 (35-40)            | 40 (39-40)            | 0.062   |
| Sex (M:F)               | 7:3                   | 5:6                   | 0.39    |
| Race                    |                       |                       |         |
| White                   | 8                     | 7                     | 0.64    |
| Black/other             | 2                     | 4                     |         |

HC: healthy controls, M; males, F: females. Statistical analyses were performed using Mann Whitney U test for non-parametric continuous variables and data reported as median, 25%-75% interquartile ranges, whereas the Fisher's exact or Chi-square test were used for categorical data. p values were considered significant when  $p < 0.05$  using two-tailed tests.

Supplementary Table 2: Characteristics of infants with symptomatic cCMV infection included and excluded from downstream analyses.

|                                      | Symptomatic<br>CMV Included (n=49) | Symptomatic CMV<br>Excluded (n=6) | P value |
|--------------------------------------|------------------------------------|-----------------------------------|---------|
| <b>Demographic Information</b>       |                                    |                                   |         |
| Sex, males, n (%)                    | 30 (61%)                           | 2 (33%)                           | >0.99   |
| Gestational age (weeks)              | 39 (38-40)                         | 37.5 (36-39)                      | 0.10    |
| Birth weight (grams)                 | 3,035 (2,457-3,278)                | 2,968 (2,199-3,190)               | 0.52    |
| Birth length (cm)                    | 48 (46-49)                         | 47 (42.5-48.5)                    | 0.23    |
| Head circumference (cm)              | 33.4 (32-34.4)                     | 33 (29.5-33.5)                    | 0.22    |
| Age at sample collection (days)      | 17 (11-22)                         | 17 (9.5-23)                       | 0.99    |
| <b>Physical Exam findings, n (%)</b> |                                    |                                   |         |
| Rash                                 | 16 (33%)                           | 2 (33%)                           | >0.99   |
| Splenomegaly                         | 12 (24%)                           | 3 (50%)                           | 0.66    |
| Hepatomegaly                         | 11 (22%)                           | 2 (33%)                           | 0.62    |
| SGA                                  | 10 (20%)                           | 0                                 | 0.58    |
| Microcephaly                         | 8 (16%)                            | 2 (33%)                           | 0.30    |
| IUGR                                 | 5 (10%)                            | 1 (17%)                           | 0.51    |
| <b>Laboratory results</b>            |                                    |                                   |         |
| WBC (cells/mm <sup>3</sup> )         | 10,735 (8,355-13,133)              | 13,645 (10,830-16,528)            | 0.20    |
| Hemoglobin (g/dL)                    | 13.6 (11.3-17.2)                   | 17 (13.7-18.9)                    | 0.14    |
| Hematocrit (%)                       | 40.1 (33.4-48.4)                   | 49.6 (38.9-55)                    | 0.16    |
| Platelet count (/mm <sup>3</sup> )   | 257,000<br>(94,250-391,500)        | 290,000<br>(131,000-442,250)      | 0.80    |
| ALT (U/L)                            | 20 (14-31)                         | 25 (15.5-63.5)                    | 0.49    |
| Direct bilirubin (mg/dL)             | 0.3 (0.2-0.53)                     | 0.4 (0.2-3)                       | 0.63    |
| <b>Audiologic findings, n (%)</b>    |                                    |                                   |         |
| Abnormal ABR at any time             | 22 (45%)                           | 2 (33%)                           | 0.69    |
| Abnormal initial ABR                 | 9 (18%)                            | 0                                 | 0.57    |
| Abnormal follow up ABR               | 13 (32%)                           | 2 (33%)                           | 0.66    |

CMV, cytomegalovirus; SGA, small for gestational age; IUGR, intrauterine growth restriction; WBC, white blood cell; ALT, alanine aminotransferase; CT, computed tomography; MRI, magnetic resonance imaging; ABR, auditory brainstem response. Statistical analyses were performed using Mann-Whitney U test for non-parametric continuous variables and data reported as median, 25%-75% interquartile ranges, whereas the Fisher's exact or Chi-square test were used for categorical data. p values were considered significant when  $p < 0.05$  using two-tailed tests.

Supplementary Table 3: Demographic and clinical characteristics of healthy controls and infants with symptomatic and asymptomatic cCMV infection included in the discovery cohort

|                             | Healthy Controls<br>n=10 | Symptomatic<br>Congenital CMV<br>n=25 | Asymptomatic<br>Congenital CMV<br>n=16 | p-value |
|-----------------------------|--------------------------|---------------------------------------|----------------------------------------|---------|
| Age at enrollment<br>(days) | 11 [7-33]                | 17 [11-20]                            | 15.5 [10.5-21]                         | 0.73    |
| Gestational age<br>(weeks)  | 38 [35-40]               | 39 [38-40]                            | 39 [39-40]                             | 0.12    |
| Sex, males, n (%)           | 7 (70%)                  | 13 (52%)                              | 8 (50%)                                | 0.56    |
| Race, n,<br>White           | 8                        | 20                                    | 15                                     | 0.46    |
| Black or other              | 2                        | 5                                     | 1                                      |         |

Statistical analyses were performed using Kruskal-Wallis test for non-parametric continuous variables and data reported as median, 25%-75% interquartile ranges, whereas the Fisher's exact or Chi-square test were used for categorical data. p values were considered significant when  $p < 0.05$  using two-tailed tests.

Supplementary Table 4: Top 10 upregulated and downregulated genes identified in the discovery sets of infants with symptomatic or asymptomatic cCMV infection

| Symptomatic cCMV biosignature (2,592 genes) |             |                      |             | Asymptomatic cCMV biosignature (3,324 genes) |             |                      |             |
|---------------------------------------------|-------------|----------------------|-------------|----------------------------------------------|-------------|----------------------|-------------|
| Top 10 upregulated                          | Fold change | Top 10 downregulated | Fold change | Top 10 upregulated                           | Fold change | Top 10 downregulated | Fold change |
| IFI44L                                      | 10.24       | HBE1                 | -6.25       | IFI44L                                       | 8.61        | HBE1                 | -9.09       |
| LAG3                                        | 7.48        | MARCHF2              | -2.70       | LAG3                                         | 7.24        | TREML3               | -4.17       |
| IFI44                                       | 7.10        | TREML3P              | -2.63       | GZMH                                         | 7.01        | RUNDC3A              | -3.70       |
| GZMH                                        | 6.33        | KIAA1324             | -2.63       | IFI44                                        | 6.13        | TMEM158              | -3.57       |
| IFIT1                                       | 6.14        | BEX1                 | -2.56       | IFIT1                                        | 5.53        | GYPA                 | -3.33       |
| PPP2R2B                                     | 5.83        | HS.545426            | -2.50       | IGJ                                          | 5.34        | MARCHF2              | -3.03       |
| MCOLN2                                      | 5.12        | SMIM5                | -2.38       | GBP5                                         | 5.19        | SLC6A10P             | -3.03       |
| OAS3                                        | 5.07        | FLCN                 | -2.38       | PPP2R2B                                      | 4.98        | BEX1                 | -2.94       |
| GBP5                                        | 4.73        | DPM2                 | -2.33       | MCOLN2                                       | 4.79        | TCP11L2              | -2.94       |
| JCHAIN                                      | 4.70        | CABP5                | -2.33       | FGFBP2                                       | 4.52        | KEL                  | -2.94       |

Supplementary Table 5: Top 10 upregulated and downregulated shared and unique genes identified in the discovery sets of infants with symptomatic or asymptomatic congenital cCMV infection.

| Symptomatic and Asymptomatic cCMV shared gene List (2,160) |                      | Unique Symptomatic cCMV gene List (432) |             |                      |             | Unique Asymptomatic cCMV gene List (1,164) |             |                      |             |
|------------------------------------------------------------|----------------------|-----------------------------------------|-------------|----------------------|-------------|--------------------------------------------|-------------|----------------------|-------------|
| Top 10 upregulated                                         | Top 10 downregulated | Top 10 upregulated                      | Fold change | Top 10 downregulated | Fold change | Top 10 upregulated                         | Fold change | Top 10 downregulated | Fold change |
| IFI44L                                                     | HBE1                 | CCZ1B                                   | 4.24        | KIAA1324             | -2.63       | ITGB1BP1                                   | 3.30        | RUNDC3A              | -3.70       |
| LAG3                                                       | MARCHF2              | OTOF                                    | 3.67        | SH3BGRL2             | -2.13       | CLECL1                                     | 2.86        | TMEM158              | -3.57       |
| IFI44                                                      | TREML3               | KIR2DL1                                 | 2.64        | TREML1               | -2.08       | IDO1                                       | 2.37        | GYPA                 | -3.33       |
| GZMH                                                       | BEX1                 | ANKFY1                                  | 2.48        | TNNC2                | -1.96       | DNTT                                       | 2.36        | SLC6A10P             | -3.03       |
| IFIT1                                                      | HS.545426            | HS.553301                               | 2.24        | TREM1                | -1.92       | TNFRSF13B                                  | 2.17        | TCP11L2              | -2.94       |
| PPP2R2B                                                    | SMIM5                | TRGV2                                   | 2.23        | LY6G6F               | -1.89       | HRK                                        | 2.16        | FLCN                 | -2.86       |
| MCOLN2                                                     | FLCN                 | TMEM191A                                | 2.16        | RN5S9                | -1.89       | AL845472.2                                 | 2.13        | TNS1                 | -2.86       |
| OAS3                                                       | DPM2                 | MBTD1                                   | 2.16        | VWF                  | -1.89       | LOC650919                                  | 2.08        | LOC732134            | -2.78       |
| GBP5                                                       | CABP5                | SNRPGP5                                 | 2.12        | ICAM4                | -1.82       | TSPAN13                                    | 2.00        | SESN3                | -2.70       |
| IGJ                                                        | BPGM                 | MTE                                     | 2.12        | GPR177               | -1.82       | IGKV5-2                                    | 1.99        | HEMGN                | -2.70       |

Supplementary Table 6: Comparison of differentially expressed genes amongst modular groups in symptomatic and asymptomatic congenital CMV infection

| Module | Function          | Genes in Module | Symptomatic cCMV                   |                                    | Asymptomatic cCMV                  |                                    | p-value |
|--------|-------------------|-----------------|------------------------------------|------------------------------------|------------------------------------|------------------------------------|---------|
|        |                   |                 | Differentially Expressed Genes (n) | Differentially Expressed Genes (%) | Differentially Expressed Genes (n) | Differentially Expressed Genes (%) |         |
| M1.2   | Interferon        | 36              | 30                                 | 83%                                | 30                                 | 83%                                | >0.999  |
| M3.4   | Interferon        | 62              | 42                                 | 68%                                | 44                                 | 71%                                | >0.999  |
| M5.12  | Interferon        | 63              | 41                                 | 65%                                | 36                                 | 57%                                | 0.655   |
| M4.14  | Monocytes         | 62              | -10                                | -16%                               | -7                                 | -11%                               | 0.856   |
| M5.15  | Neutrophils       | 24              | 0                                  | 0%                                 | 1                                  | 4%                                 | >0.999  |
| M3.2   | Inflammation      | 147             | -38                                | -26%                               | -68                                | -46%                               | 0.104   |
| M4.2   | Inflammation      | 50              | -7                                 | -14%                               | -13                                | -26%                               | 0.684   |
| M4.6   | Inflammation      | 116             | -22                                | -19%                               | -28                                | -24%                               | 0.788   |
| M4.13  | Inflammation      | 82              | -46                                | -56%                               | -55                                | -67%                               | 0.555   |
| M5.1   | Inflammation      | 244             | -39                                | -16%                               | -29                                | -12%                               | 0.714   |
| M5.7   | Inflammation      | 139             | -35                                | -25%                               | -35                                | -25%                               | >0.999  |
| M4.1   | T cells           | 68              | -4                                 | -6%                                | 1                                  | 1%                                 | 0.864   |
| M4.15  | T cells           | 45              | 16                                 | 36%                                | 21                                 | 47%                                | 0.816   |
| M3.6   | Cytotoxic T cells | 53              | 34                                 | 64%                                | 38                                 | 72%                                | 0.598   |
| M4.10  | B-cells           | 34              | 32                                 | 94%                                | 32                                 | 94%                                | >0.999  |
| M4.11  | Plasma cells      | 20              | 11                                 | 55%                                | 10                                 | 50%                                | >0.999  |

p-values are calculated using a Fisher's exact T-test adjusted for multiple comparisons by Benjamini-Hochberg multiple test correction. p values were considered significant when  $p < 0.05$  using two-tailed tests. Positive values represent the number and proportion of genes overexpressed within a specific module, whereas negative values represent the number and proportion of genes that are underexpressed within a module.

Supplementary Table 7: Demographic characteristics of infants with congenital cCMV infection with and without late-onset SNHL

|                                                                       | cCMV with late-onset SNHL<br>(n=24) | cCMV without late-onset SNHL<br>(n=28) | p-value |
|-----------------------------------------------------------------------|-------------------------------------|----------------------------------------|---------|
| Age at enrollment (days)                                              | 16 [10-22]                          | 17 [15-21]                             | 0.52    |
| Gestational age (weeks)                                               | 39 [38.3-40]                        | 39 [38-40]                             | 0.89    |
| Sex, males, n (%)                                                     | 13 (54%)                            | 20 (71%)                               | 0.25    |
| Race, n,<br>White<br>Black or other                                   | 21<br>3                             | 26<br>2                                | 0.65    |
| Disease classification n (%)<br>Symptomatic cCMV<br>Asymptomatic cCMV | 13 (54%)<br>11 (46%)                | 16 (57%)<br>12 (43%)                   | > 0.99  |

Statistical comparisons were performed using the Kruskal-Wallis test for non-parametric continuous variables and data reported as median, 25%-75% interquartile ranges, whereas Fisher's exact test was used for the analyses of categorical data. p values were considered significant when  $p < 0.05$  using two-tailed tests.



Supplementary Table 8: Sixteen classifier genes that accurately discriminate between infants with cCMV infection who went onto developing late onset SNHL

| PROBE_ID     | SYMBOL    | Function                                                                                                                    |
|--------------|-----------|-----------------------------------------------------------------------------------------------------------------------------|
| ILMN_1779257 | CD40      | From TNF-alpha receptor family (TNFRSF5). innate immune response. Needed for microglia activation. Altered in hearing loss. |
| ILMN_1798187 | MYST2     | (KAT7) Hystone acetyl transferase                                                                                           |
| ILMN_3241104 | LOC286135 | Non-coding protein                                                                                                          |
| ILMN_1736650 | JMJD2A    | (KDM4A) protein coding gene                                                                                                 |
| ILMN_2061950 | RABGAP1   | Protein coding gene. Cell metabolism                                                                                        |
| ILMN_1679092 | RAB9B     | Membrane trafficking; innate immune response                                                                                |
| ILMN_2338038 | AK3L1     | (AK4) ATP metabolism.                                                                                                       |
| ILMN_1660179 | MATR3     | Innate immune responses                                                                                                     |
| ILMN_1779370 | ARHGEF9   | Protein coding gene. Associated with intellectual disability.                                                               |
| ILMN_1718520 | C10orf59  | (RNLS). Associated with vascular/renal regulation                                                                           |
| ILMN_3237703 | LOC645431 | No functions available                                                                                                      |
| ILMN_1655654 | MPDU1     | Protein metabolism. Associated with glycosylation defects/ intellectual disability.                                         |
| ILMN_1680193 | PAXIP1    | DNA metabolism                                                                                                              |
| ILMN_2193817 | CLEC4G    | Protein coding gene. Associated with CNS diseases.                                                                          |
| ILMN_1781431 | GLCCI1    | Glucocorticoid related                                                                                                      |
| ILMN_1804451 | LEO1      | Protein metabolism                                                                                                          |

Supplementary Figure 1: Consort diagram of enrolled healthy controls and infants with congenital CMV infection.

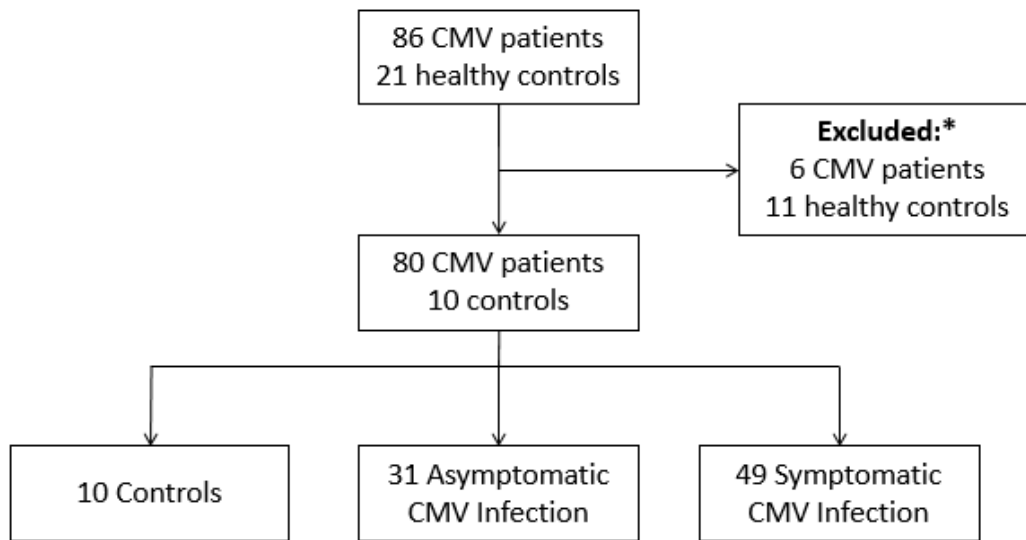

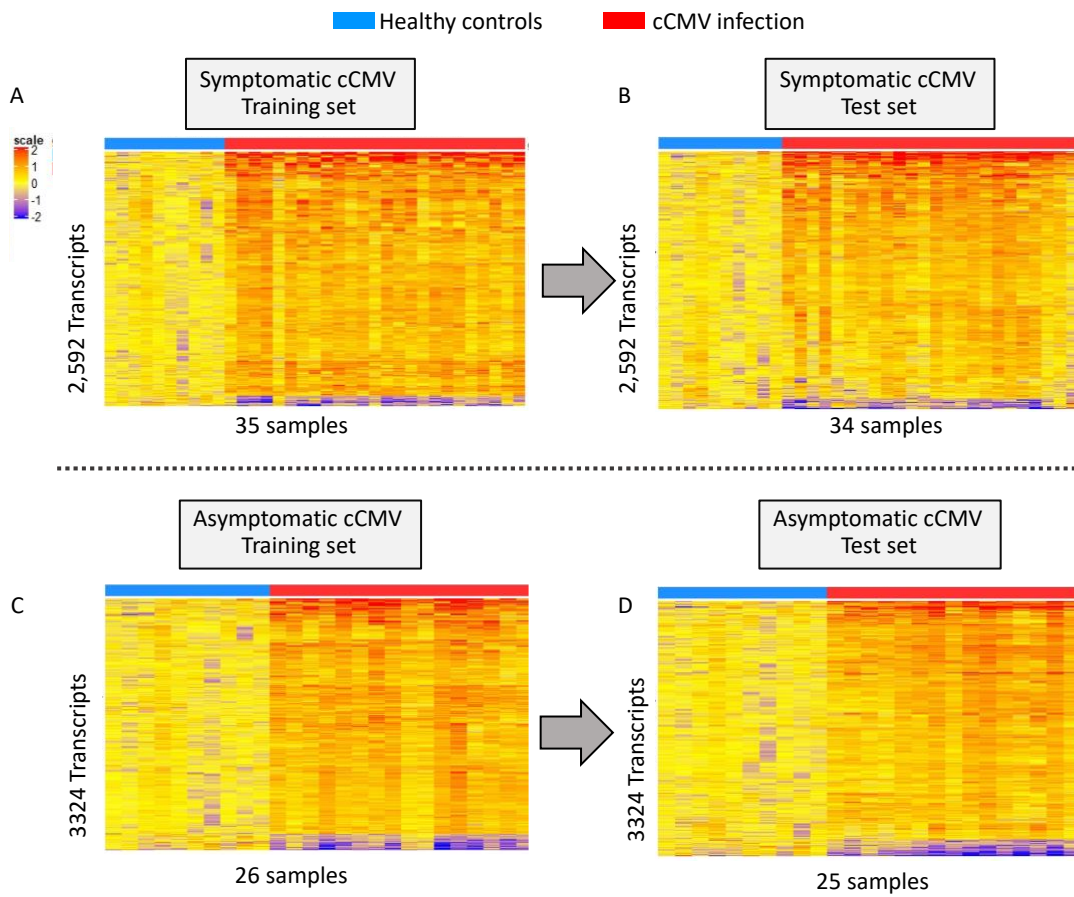

Supplementary Figure 2: Symptomatic and asymptomatic cCMV infection biosignatures are robust and reproducible. **(A)** Statistical group comparisons using linear models (LIMA) adjusted for age followed by Benjamini-Hochberg FDR  $< 0.01$  and  $\geq 1.5$  fold-change between infants with symptomatic cCMV infection ( $n=25$ ) and healthy controls ( $n=10$ ) identified 2,592 differentially expressed transcripts in the training set (symptomatic cCMV biosignature). **(B)** The transcriptional signature was validated in an independent test set of 24 infants with symptomatic cCMV and the same 10 healthy controls. Healthy controls are represented in blue and symptomatic cCMV patients in red. **(C)** A similar strategy was applied to derive and validate the asymptomatic cCMV biosignature using 16 cCMV infants in the training set and 10 healthy controls, which yielded 3,324 differentially expressed genes. **(D)** The asymptomatic cCMV biosignature was validated in an independent test set of 15 infants with asymptomatic cCMV infection and the same healthy controls. Transcripts are organized in a heatmap format where each row represents a transcript and each column a patient sample. Red color indicates overexpression and blue color underexpression of a transcript compared to the median expression of healthy controls (yellow).

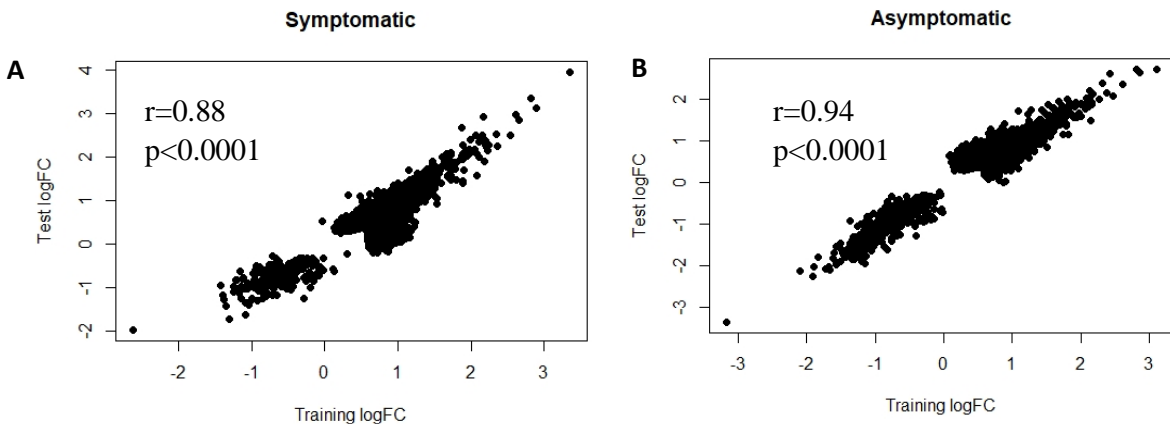

Supplemental Figure 3: Symptomatic and asymptomatic cCMV infection biosignatures are robust and reproducible. (A) Statistical group comparisons (Benjamini-Hochberg corrected FDR  $<0.01$  and  $\geq 1.5$  fold-change) between infants with symptomatic cCMV infection ( $n=24$ ) and healthy controls ( $n=10$ ) identified 1,854 differentially expressed transcripts in the test set and 2,592 transcripts between 25 infants with symptomatic cCMV and healthy controls (training set; derivation). Spearman correlation between these two gene sets derived from infants with symptomatic cCMV infection showed high level of correlation. (B) Similarly, correlations between the gene sets derived from the test set (3,699 transcripts;  $n=15$  asymptomatic cCMV infants/10 HC) and training set (3,324 transcripts;  $n=16$  asymptomatic cCMV/10 HC) were high ( $r=0.94$ ;  $p<0.0001$ ).

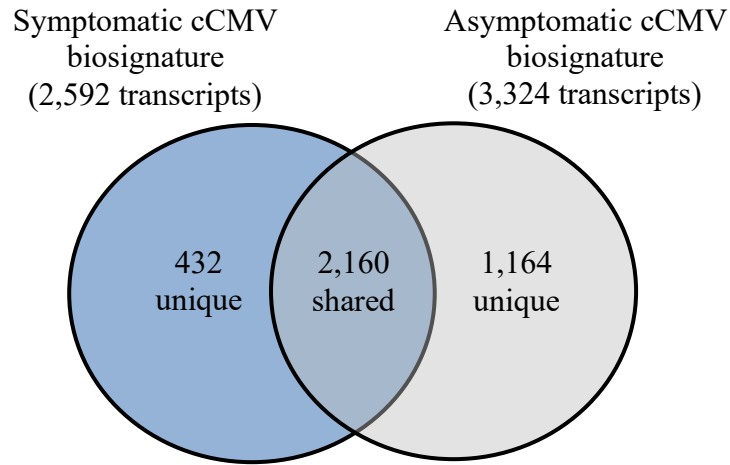

Supplementary Figure 4: Venn diagram: Overlay of symptomatic and asymptomatic cCMV biosignatures reveals both shared and unique transcripts. Overlay of symptomatic and asymptomatic cCMV biosignatures reveals both shared (2,160) and unique transcripts, 1,164 for infants with asymptomatic cCMV infection and 432 for those with symptomatic disease.

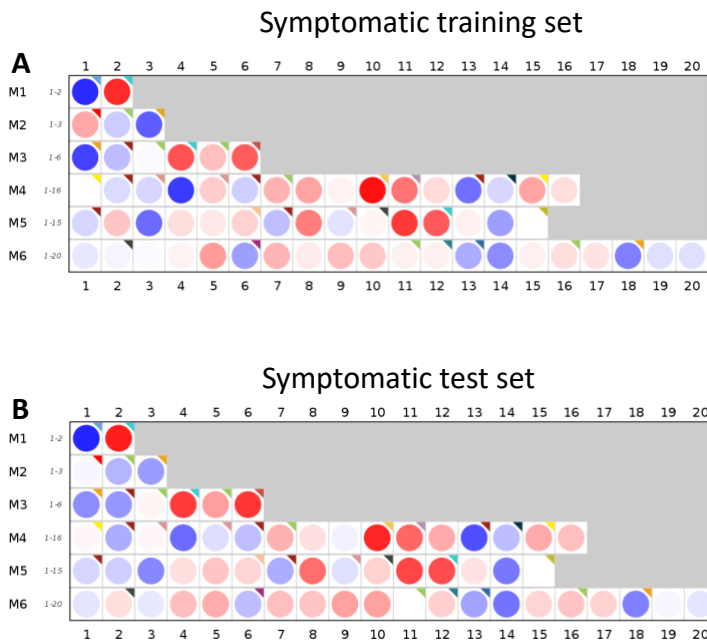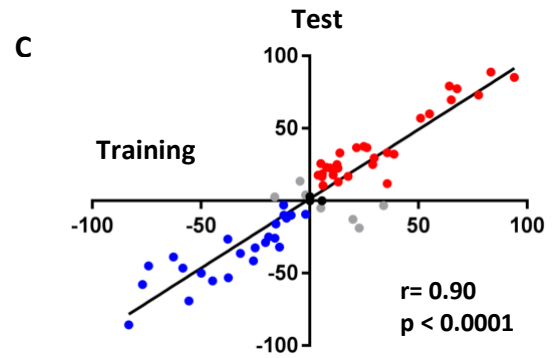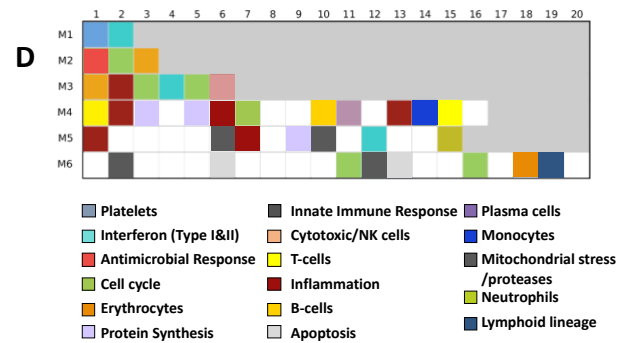

Supplementary Figure 5: Modular maps for the discovery and validation cohorts in symptomatic cCMV-infected infants. Modular maps were derived independently from the **(A)** training set (n=25) of infants with symptomatic cCMV infection and the **(B)** test set (n=24) and compared via a Spearman correlation **(C)**, demonstrating a high degree of similarity within the discovery and validation cohorts ( $r=0.90$ ,  $p < 0.0001$ ; Spearman correlation, multiple test corrections not applied). Each group was compared to 10 age-matched healthy controls. The intensity of the modules (dots) indicates the proportion of overexpressed (in red) or underexpressed (in blue) transcripts within each module. Blank dot indicates that  $<10\%$  of the genes in the module were differentially expressed. **(D)** Modular maps legend.

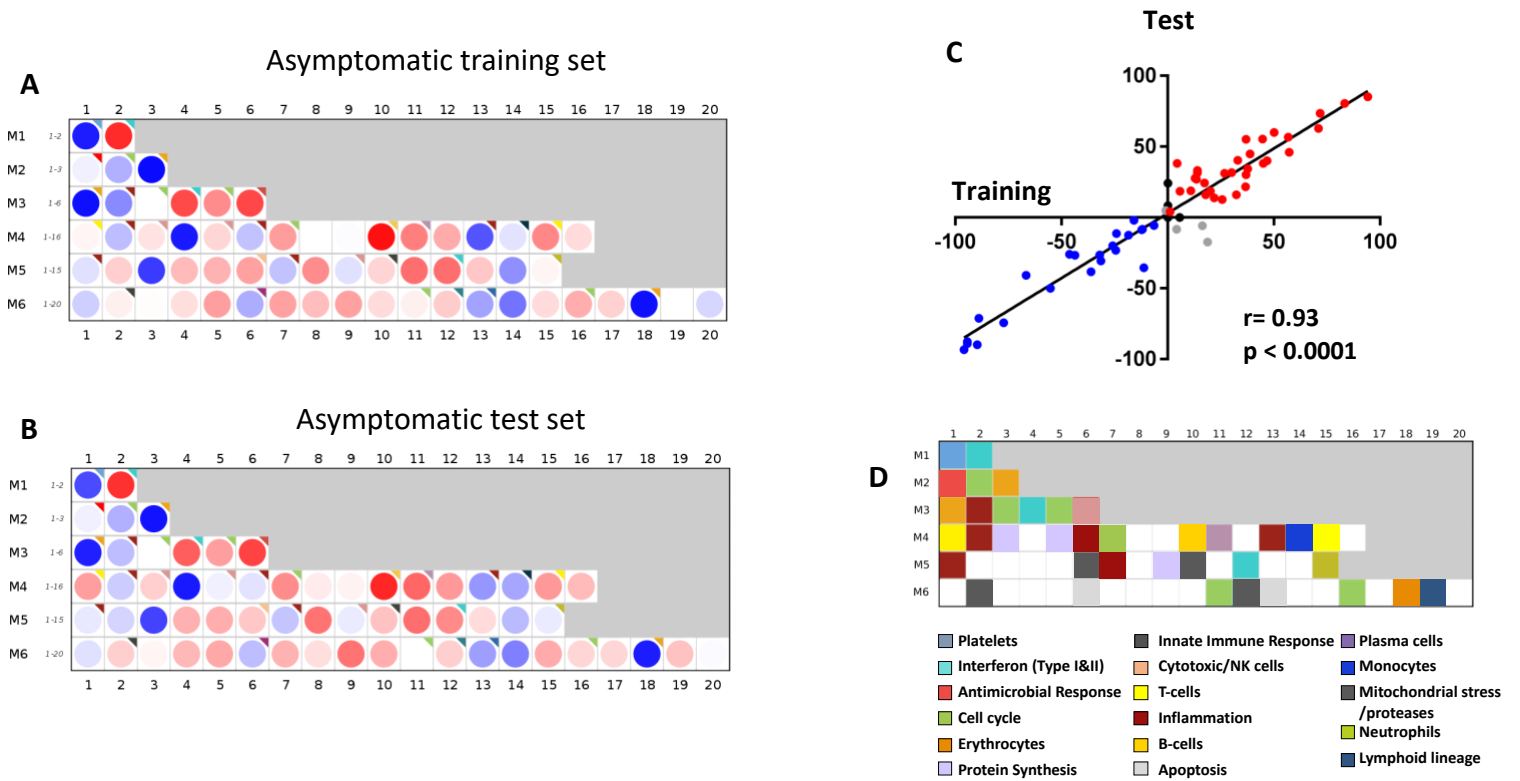

Supplementary Figure 6: Modular maps for the discovery and validation cohorts in infants with asymptomatic cCMV infection. Modular maps were derived independently from the **(A)** training set (n=16) of infants with asymptomatic cCMV infection and the **(B)** test set (n=15) and compared using Spearman correlation coefficient **(C)**, demonstrating a high degree of similarity within the discovery and validation cohorts ( $r=0.93$ ,  $p < 0.0001$ ; Spearman correlation, multiple test corrections not applied). Each group was compared to matched healthy controls. The intensity of the modules (dots) indicates the proportion of overexpressed (in red) or underexpressed (in blue) transcripts within each module. Blank dot indicates that  $<10\%$  of the genes in the module were differentially expressed. **(D)** Modular maps legend.

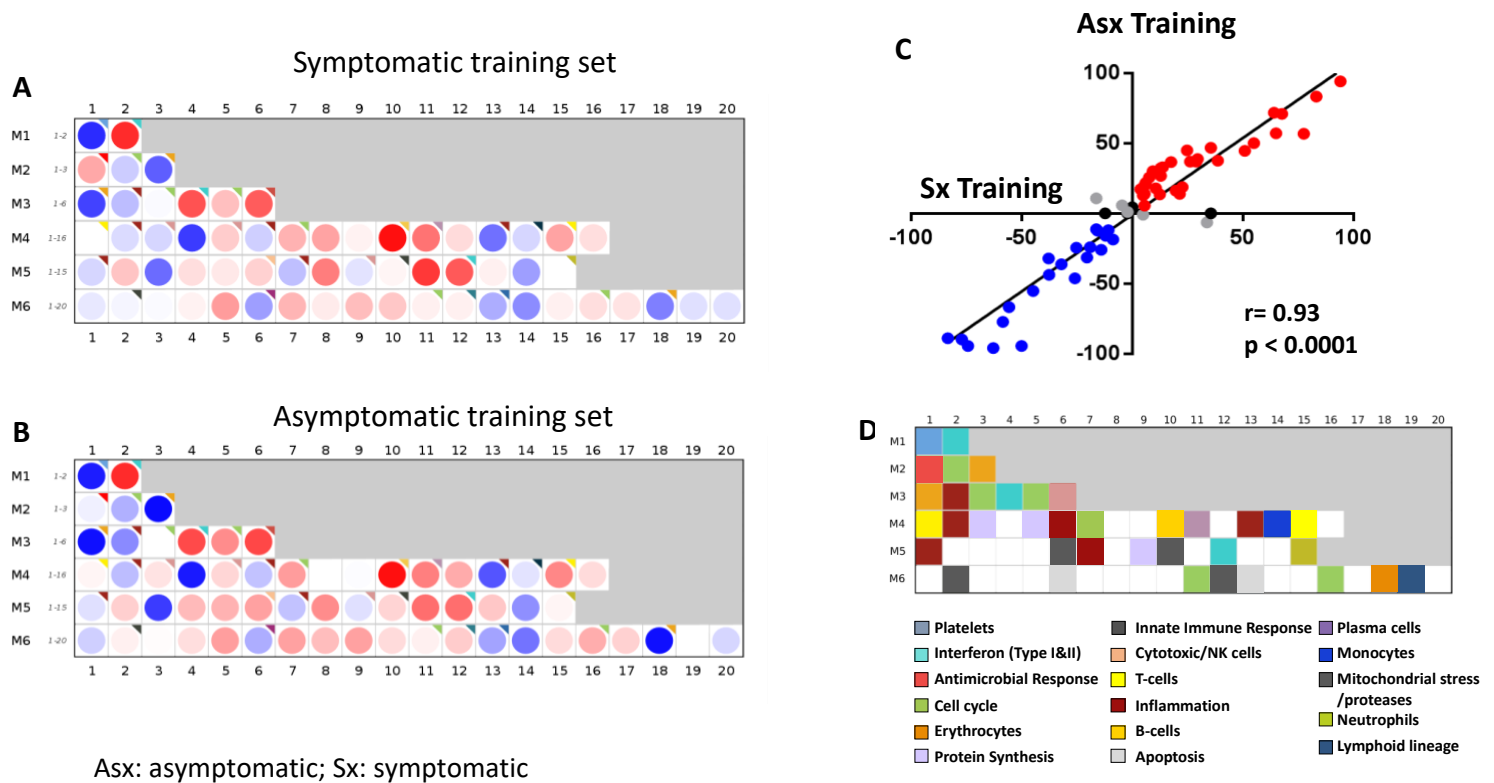

Supplementary Figure 7: Modular maps of the discovery cohorts for infants with asymptomatic and symptomatic cCMV infection. Modular maps derived from the (A) training set (n=25) of infants with symptomatic congenital CMV infection was compared with the (B) training set (n=16) of infants with asymptomatic cCMV infection using Spearman correlations coefficient (C), demonstrating a high degree of similarity between both discovery cohorts ( $r=0.93$ ,  $p < 0.0001$ ; Spearman correlation, multiple test corrections not applied), further supporting results from unsupervised cluster analyses. Asx: asymptomatic, Sx: symptomatic. Each cohort was compared to matched healthy controls. The intensity of the modules (dots) indicates the proportion of overexpressed (in red) or underexpressed (in blue) transcripts within each module. Blank dot indicates that  $<10\%$  of the genes in the module were differentially expressed. (D) Modular maps legend.



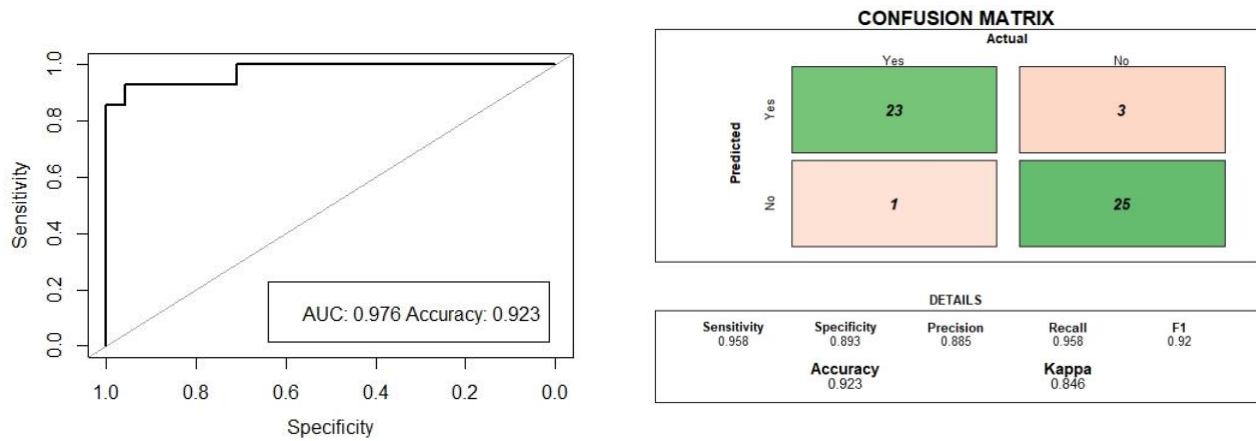

Supplementary Figure 8: Identification and validation of classifier genes for the development of sensorineural hearing loss (SNHL) in infants with either symptomatic or asymptomatic cCMV infection using Random Forest-Recursive Feature Elimination (RF-RFE). Within the cohort of infants with cCMV infection 24 infants developed SNHL at any time point during the follow-up period whereas 28 did not develop SNHL and had at least 900 days of follow-up. (A) Random Forest-Recursive Feature Elimination (RF-RFE) algorithm identified a 16-gene signature that classified cCMV infants who developed SNHL with 92.3% accuracy. (B) Performance of classification is shown using a confusion matrix.
